# Supplementary material for: Identification of Immune-Related Cells and Genes in Tumor Microenvironment of Clear Cell Renal Cell Carcinoma
Source: Front Oncol. 2020 Sep 2;10:1770. doi: 10.3389/fonc.2020.01770 (PMC7493752; doi:10.3389/fonc.2020.01770)
Supplement: Supplementary file 2 [file Table_1.xlsx]

## Sheet: Supplementary Table 1
Supplementary Table 1| KEGG pathway enrichment of immuno-related genes
Immune cells	KEGG ID	Description	Count of gene	Adjust p-value	Gene list
B cells memory	hsa04080	Neuroactive ligand-receptor interaction	35	2.26e-07	GIPR/CALCRL/GLP2R/CHRNA4/OXT/BRS3/KNG1/GRIA2/PLG/PTGFR/GRM4/F2RL3/MCHR1/CGA/LHCGR/ADCYAP1/GABRB2/TAAR1/CYSLTR2/GRIA1/SST/HTR6/SSTR5/GABRG1/CCKAR/GALR1/MC4R/BDKRB2/CHRNA9/GRM8/UTS2R/GRIN2A/GABRA5/GCGR/GABRQ
B cells memory	hsa05033	Nicotine addiction	9	0.000508747	/CHRNA4/GRIA2/GABRB2/CACNA1B/GRIA1/GABRG1/GRIN2A/GABRA5/GABRQ
B cells memory	hsa04610	Complement and coagulation cascades	11	0.00744263	F7/F11/SERPINE1/VWF/KNG1/PLG/C4BPB/F2RL3/BDKRB2/FGG/CR1L
Plasma cells	hsa05150	Staphylococcus aureus infection	6	0.0252376	KRT17/KRT34/MBL2/KRT20/KRT39/KRT25
Plasma cells	hsa04960	Aldosterone-regulated sodium reabsorption	4	0.0252376	PRKCG/SCNN1G/SCNN1B/SFN
Plasma cells	hsa05340	Primary immunodeficiency	4	0.0252376	CD79A/IGLL1/CD19/TNFRSF13B
T cells regulatory	hsa04060	Cytokine-cytokine receptor interaction	28	2.35e-05	TNFRSF17/TNFRSF9/THPO/IFNG/BMP5/FASLG/TNFSF14/EPO/CCL25/IL6/CXCL9/CD27/INHBE/XCL1/XCL2/IL2RG/CXCL13/CSF2/CCL19/XCR1/IL20RB/CCR8/CXCR3/TNFRSF18/LTA/LTB/TNFRSF13B/CCL5
T cells regulatory	hsa05340	Primary immunodeficiency	10	2.35e-05	CD79A/IGLL1/IL2RG/CD8A/ICOS/CD3D/CD8B/CD19/CD3E/TNFRSF13B
T cells regulatory	hsa04640	Hematopoietic cell lineage	15	3.11e-05	THPO/DNTT/CD2/EPO/IL6/CD8A/MS4A1/KIT/CSF2/CD3D/CD8B/CD7/CD19/CD3E/HLA-DOB
T cells regulatory	hsa04061	Viral protein interaction with cytokine and cytokine receptor	15	3.11e-05	TNFSF14/CCL25/IL6/CXCL9/XCL1/XCL2/IL2RG/CXCL13/CCL19/XCR1/IL20RB/CCR8/CXCR3/LTA/CCL5
T cells regulatory	hsa00591	Linoleic acid metabolism	7	0.00108431	PLA2G3/PLA2G2D/CYP2C9/CYP1A2/PLA2G4F/PLA2G1B/PLA2G2A
T cells regulatory	hsa04080	Neuroactive ligand-receptor interaction	26	0.00108431	CHRNA4/GRIK5/PPY/CALCA/KNG1/VIPR1/GRIA2/EDN3/CGA/ADCYAP1/GZMA/GABRB2/PTH/GABRG1/CCKAR/AVPR1A/MC4R/TAC3/GPR35/F2/PMCH/NPY4R/GCGR/INSL3/NPY4R2/SSTR3
T cells regulatory	hsa05323	Rheumatoid arthritis	12	0.00121814	ATP6V0A4/IFNG/ATP6V1B1/IL6/ATP6V0D2/ATP6V1G3/PTH/CTLA4/CSF2/LTB/HLA-DOB/CCL5
T cells regulatory	hsa04610	Complement and coagulation cascades	11	0.00220934	VTN/KNG1/C4BPA/C1R/MBL2/C2/FGG/FGA/C8G/F2/C1S
T cells regulatory	hsa05143	African trypanosomiasis	7	0.0037965	APOL1/IFNG/KNG1/FASLG/PRKCG/IL6/HPR
T cells regulatory	hsa04966	Collecting duct acid secretion	6	0.00409232	SLC4A1/ATP6V0A4/ATP6V1B1/ATP6V0D2/ATP6V1G3/CLCNKB
T cells regulatory	hsa04975	Fat digestion and absorption	7	0.00608782	NPC1L1/PLA2G3/APOA4/PLA2G2D/MTTP/PLA2G1B/PLA2G2A
T cells regulatory	hsa04660	T cell receptor signaling pathway	11	0.00905913	PAK5/IFNG/CD8A/CTLA4/ICOS/CSF2/CD3D/CD8B/PDCD1/CARD11/CD3E
T cells regulatory	hsa05150	Staphylococcus aureus infection	10	0.0164311	KRT34/C1R/MBL2/C2/KRT20/FGG/C1S/KRT39/KRT25/HLA-DOB
T cells regulatory	hsa00592	alpha-Linolenic acid metabolism	5	0.0164311	PLA2G3/PLA2G2D/PLA2G4F/PLA2G1B/PLA2G2A
T cells regulatory	hsa04960	Aldosterone-regulated sodium reabsorption	6	0.0164311	PRKCG/FXYD4/KCNJ1/SCNN1G/SCNN1B/HSD11B2
T cells regulatory	hsa00140	Steroid hormone biosynthesis	7	0.0431309	CYP11A1/CYP1A2/UGT2B4/UGT2A1/HSD11B2/UGT1A8/UGT1A10
T cells regulatory	hsa04721	Synaptic vesicle cycle	8	0.0468776	SLC6A2/SLC1A6/ATP6V0A4/ATP6V1B1/ATP6V0D2/CACNA1B/ATP6V1G3/SLC18A3
Macrophages M0	hsa04610	Complement and coagulation cascades	15	0.000396711	PLAUR/BDKRB1/SERPINE1/VTN/C9/KNG1/PROC/CR2/F3/C4BPA/BDKRB2/FGA/F2/SERPINA5/SERPINB2
Macrophages M0	hsa04080	Neuroactive ligand-receptor interaction	33	0.000412723	PRSS3/NPFFR2/GLP2R/OPRK1/BDKRB1/BRS3/NMU/GABRG2/KNG1/CRHR1/EDN3/MCHR1/PYY/GRP/CGA/LHCGR/CHRNA1/UCN2/DRD2/GRIK4/CYSLTR2/GRIA1/SST/CCKAR/MC4R/BDKRB2/NTSR2/ADRA1D/LEP/F2/OXTR/CHRM2/NPBWR1
Macrophages M0	hsa04974	Protein digestion and absorption	15	0.000558855	PRSS3/COL11A1/ATP1A3/COL1A1/MEP1A/COL7A1/SLC8A2/COL10A1/COL5A1/COL6A3/COL1A2/COL22A1/SLC6A19/SLC36A2/CELA3B
Macrophages M0	hsa04966	Collecting duct acid secretion	7	0.00525586	SLC4A1/ATP4A/ATP6V0A4/ATP6V1B1/ATP6V0D2/ATP6V1G3/CLCNKB
Macrophages M0	hsa04975	Fat digestion and absorption	8	0.0094862	APOB/PLA2G3/APOA4/PLA2G2D/MTTP/PLA2G2C/PLA2G2A/PNLIPRP2
Macrophages M0	hsa00590	Arachidonic acid metabolism	10	0.0094862	PTGS2/PLA2G3/PTGDS/PLA2G2D/PTGIS/PTGES/PLA2G4D/CYP4A11/PLA2G2C/PLA2G2A
Dendritic cells resting	hsa04080	Neuroactive ligand-receptor interaction	18	0.0149038	PRSS3/GABRA3/BDKRB1/OXT/GRIK5/CALCA/CRHR1/EDN3/PYY/CGA/GRIK4/PTH/CCKAR/BDKRB2/TACR3/F2/AGTR2/GCGR
Dendritic cells resting	hsa04610	Complement and coagulation cascades	8	0.0202149	F11/BDKRB1/SERPINE1/PROC/C4BPA/BDKRB2/FGA/F2
Dendritic cells resting	hsa04640	Hematopoietic cell lineage	8	0.0383483	CSF3/IL1R2/EPO/IL6/CD1A/CD1C/CD1B/CD1E
Mast cells resting	hsa04061	Viral protein interaction with cytokine and cytokine receptor	19	4.55e-09	CCL7/CCL20/TNFSF14/CCL25/IL6/CXCL9/CXCL13/CCR5/CXCL3/CXCL5/CXCL1/CXCL8/IL20RB/CXCR3/CCL5/CCL4/CCL4L2/CCL3L1/CCL3
Mast cells resting	hsa04060	Cytokine-cytokine receptor interaction	31	9.4e-09	TNFRSF17/TNFRSF9/OSM/CCL7/IFNG/CCL20/IL1R2/FASLG/TNFSF14/CCL25/IL6/IL1RN/IL36B/CXCL9/CD27/INHBE/CXCL13/CCR5/CXCL3/CXCL5/CXCL1/CSF2/CXCL8/CXCR6/IL20RB/CXCR3/CCL5/CCL4/CCL4L2/CCL3L1/CCL3
Mast cells resting	hsa05323	Rheumatoid arthritis	15	2.24e-06	ATP6V0A4/IFNG/CCL20/IL6/ATP6V1G3/CTLA4/CXCL3/CXCL5/CXCL1/CSF2/CXCL8/HLA-DOB/CCL5/CCL3L1/CCL3
Mast cells resting	hsa04080	Neuroactive ligand-receptor interaction	26	0.000116196	PRSS3/CHRNA4/BRS3/NMU/CALCA/GCG/CRHR1/PLG/EDN3/LHCGR/CHRNA1/UCN2/HTR2C/GRIK4/GABRA2/SST/GIP/TAC3/TACR3/CHRNA9/F2/PMCH/NPY4R/GCGR/NPY4R2/SSTR3
Mast cells resting	hsa04062	Chemokine signaling pathway	18	0.000191709	CCL7/CCL20/CCL25/CXCL9/CXCL13/CCR5/CXCL3/CXCL5/CXCL1/GNG4/CXCL8/CXCR6/CXCR3/CCL5/CCL4/CCL4L2/CCL3L1/CCL3
Mast cells resting	hsa04657	IL-17 signaling pathway	11	0.00192967	MMP9/CCL7/IFNG/CCL20/IL6/MMP13/CXCL3/CXCL5/CXCL1/CSF2/CXCL8
Mast cells resting	hsa04640	Hematopoietic cell lineage	11	0.00267617	CD38/DNTT/IL1R2/CD2/IL6/CD8A/CSF2/CD3D/CD8B/CD3E/HLA-DOB
Mast cells resting	hsa05142	Chagas disease (American trypanosomiasis)	11	0.00284342	PPP2R2C/SERPINE1/IFNG/FASLG/IL6/CD3D/CXCL8/CD3E/CCL5/CCL3L1/CCL3
Mast cells resting	hsa04975	Fat digestion and absorption	7	0.00284342	NPC1L1/APOB/PLA2G3/APOA4/PLA2G2D/MTTP/PLA2G2A
Mast cells resting	hsa04610	Complement and coagulation cascades	9	0.0113071	SERPINE1/VTN/F3/PLG/C4BPA/FGG/FGA/FGB/F2
Mast cells resting	hsa05340	Primary immunodeficiency	6	0.0113071	CD79A/CD8A/ICOS/CD3D/CD8B/CD3E
Mast cells resting	hsa00591	Linoleic acid metabolism	5	0.0201652	PLA2G3/PLA2G2D/CYP2C9/PLA2G4F/PLA2G2A
Mast cells resting	hsa04064	NF-kappa B signaling pathway	9	0.0318312	TNFSF14/LBP/BCL2A1/CARD14/CXCL3/CXCL1/CXCL8/CCL4/CCL4L2
Mast cells resting	hsa05146	Amoebiasis	9	0.0318312	IFNG/IL1R2/IL6/CXCL3/CXCL1/CSF2/CXCL8/COL4A6/SERPINB4
Mast cells resting	hsa04620	Toll-like receptor signaling pathway	9	0.0318644	LBP/IL6/CXCL9/CXCL8/CCL5/CCL4/CCL4L2/CCL3L1/CCL3
Mast cells resting	hsa04660	T cell receptor signaling pathway	9	0.0318644	IFNG/CD8A/CTLA4/ICOS/CSF2/CD3D/CD8B/PDCD1/CD3E
Mast cells resting	hsa04979	Cholesterol metabolism	6	0.0319967	APOB/APOH/APOA4/APOC3/ANGPTL8/APOC2
